# Supplementary material for: A photoluminescent thermometer made from a thermoresponsive tetranuclear gold complex and phosphor N630
Source: Royal Society of Chemistry journal article supplement (doi:10.1039/d1dt03189a), 2021-01-01
Supplement: d1dt03189a1.pdf [file d1dt03189a1.pdf]

Electronic Supplementary Material (ESI) for DALTON TRANSACTIONS.

## **A Photoluminescent Thermometer made from a Thermoresponsive Tetranuclear Gold Complex and Phosphor N630**

Wen-Di Xu,<sup>a</sup> Jia-Jun Yan,<sup>a</sup> Meng-Yao Feng,<sup>a</sup> Hai-Yan Li,<sup>b</sup> David James Young,<sup>c</sup> and Zhi-Gang Ren<sup>\*a</sup>

---

<sup>a</sup> College of Chemistry, Chemical Engineering and Materials Science, Soochow University, Suzhou 215123, Jiangsu, P. R. China. E-mail: renzhigang@suda.edu.cn; Fax: +86-512-65880328.

<sup>b</sup> Analysis and Testing Center, Soochow University, Suzhou 215123, Jiangsu, P. R. China.

<sup>c</sup> College of Engineering, Information Technology and Environment, Charles Darwin University, Northern Territory 0909, Australia.

---

# Contents

|                                                                                                                                   |    |
|-----------------------------------------------------------------------------------------------------------------------------------|----|
| <b>Fig. s1.</b> TGA curve of <b>1</b> ·EtOH from room temperature to 500 °C. ....                                                 | S2 |
| <b>Fig. s2.</b> IR spectra of compound <b>1</b> and H <sub>2</sub> mba. ....                                                      | S2 |
| <b>Fig. s3.</b> <sup>1</sup> H, <sup>13</sup> C and <sup>31</sup> P NMR spectra of <b>1</b> in DMSO- <i>d</i> <sub>6</sub> . .... | S3 |
| <b>Fig. s4.</b> Solid-state excitation (black) and emission (green) spectra of <b>1</b> ·EtOH at room temperature. ....           | S4 |
| <b>Fig. s5.</b> PL intensity of <b>1</b> over five cycles between 80 and 300 K and between 300 and 370K.....                      | S4 |
| <b>Fig. s6.</b> Emission spectra of N630 at 80-300 K (left) and at 300-370 K (right) at an excitation wavelength of 370 nm.....   | S4 |
| <b>Fig. s7.</b> Solid-state UV-Vis spectra of compound <b>1</b> at 295, 325 and 355 K.....                                        | S5 |
| <b>Table s1.</b> Selected crystallographic data and refinement parameters for <b>1</b> ·EtOH at different temperatures. ....      | S5 |
| <b>Table s2.</b> Selected Bond Lengths and Angles of <b>1</b> ·EtOH at different temperatures. ....                               | S5 |

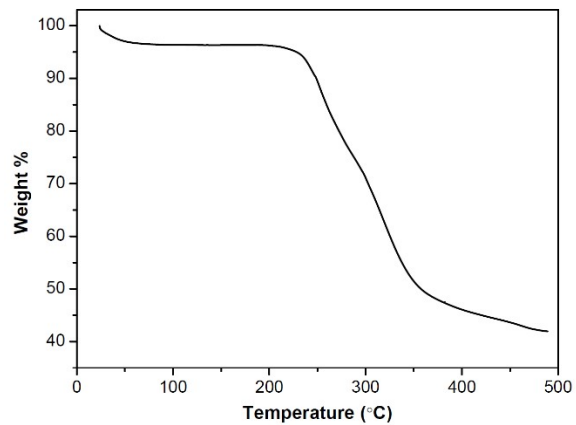

Fig. s1. TGA curve of 1·EtOH from room temperature to 500 °C.

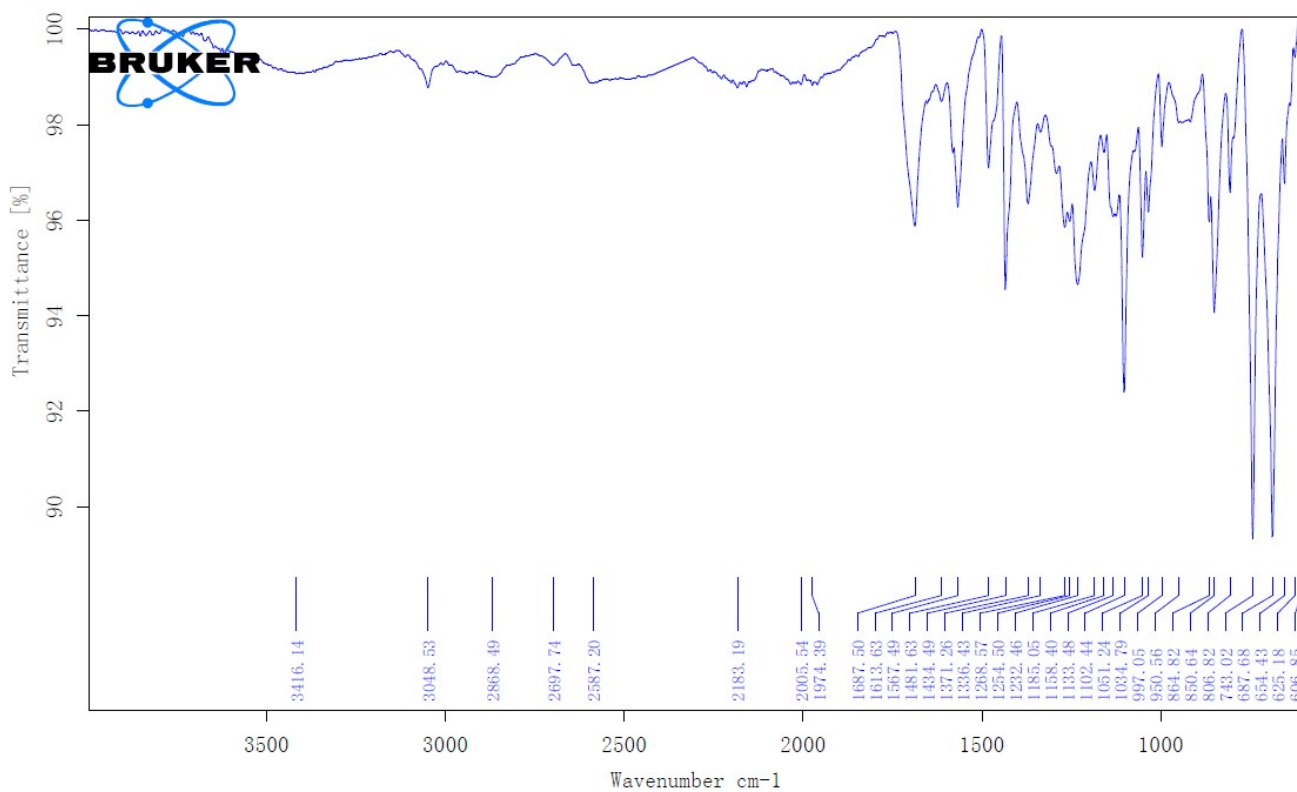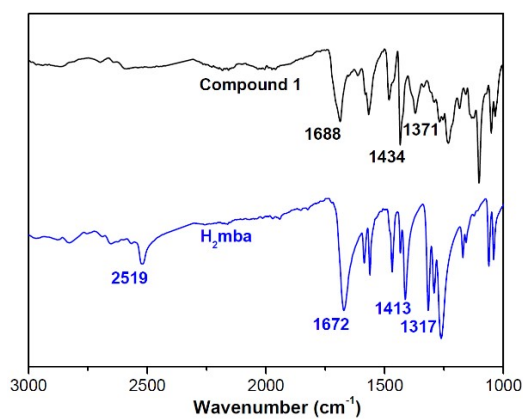

Fig. s2. IR spectra of compound 1 (upper) and H<sub>2</sub>mba (lower).

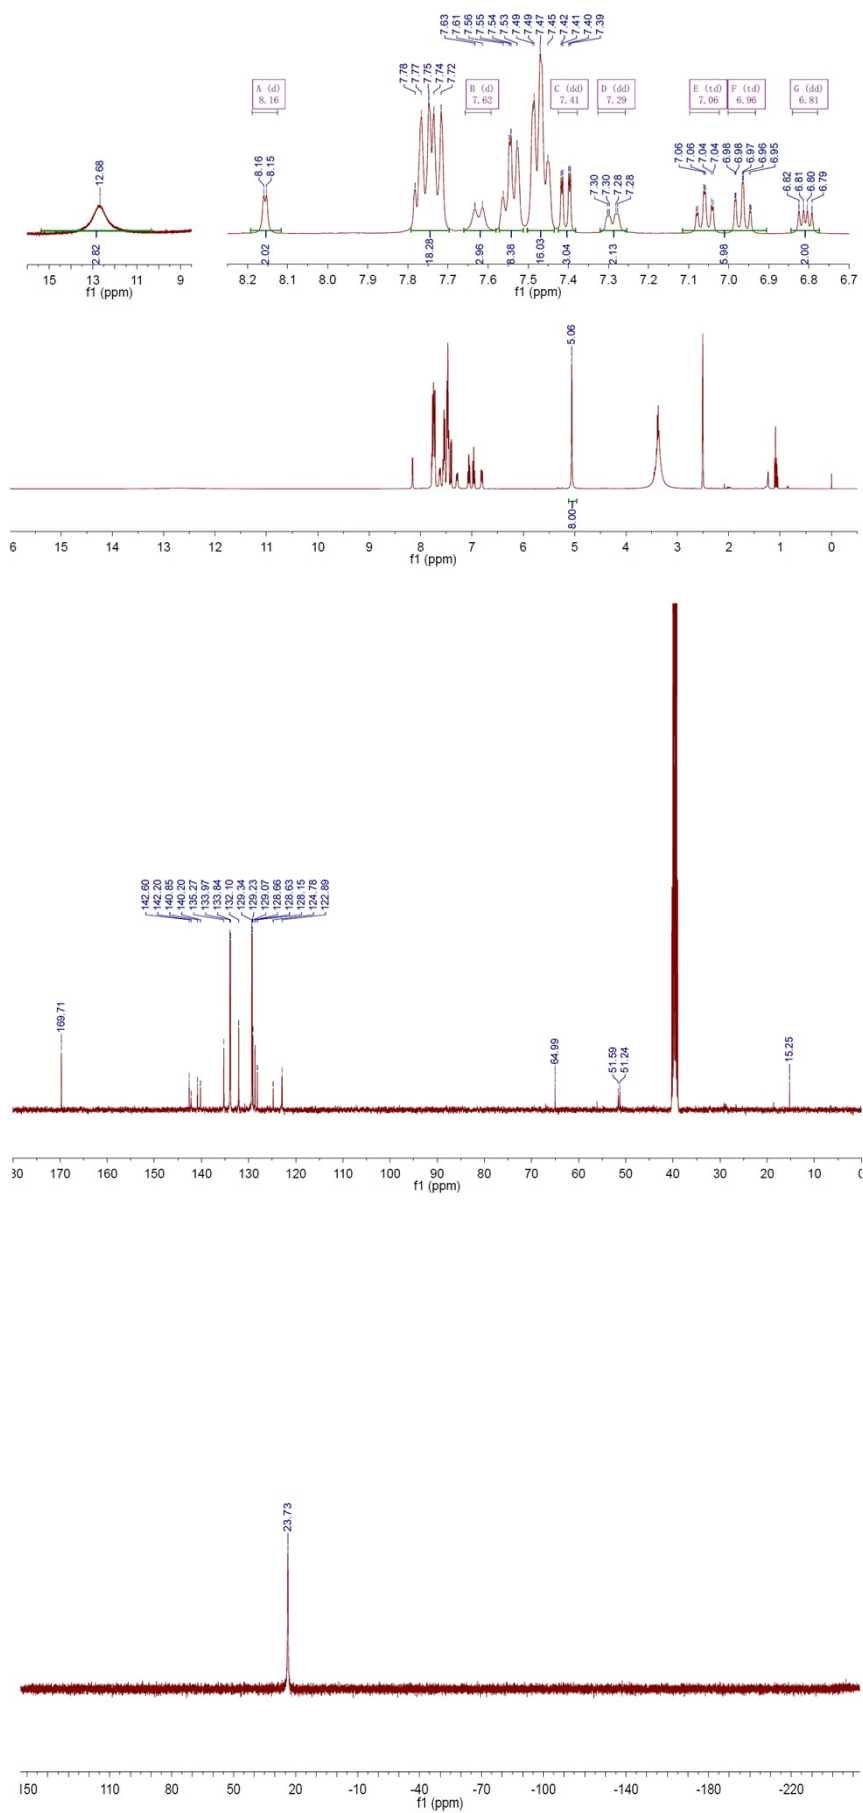

Fig. s3.  $^1\text{H}$ ,  $^{13}\text{C}$  and  $^{31}\text{P}$  NMR spectra of 1 in DMSO- $d_6$ .

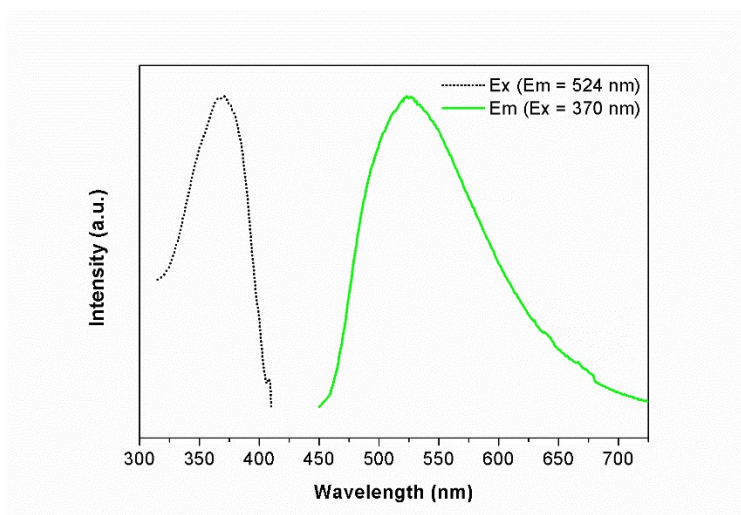

**Fig. s4.** Solid-state excitation (black) and emission (green) spectra of 1·EtOH at room temperature.

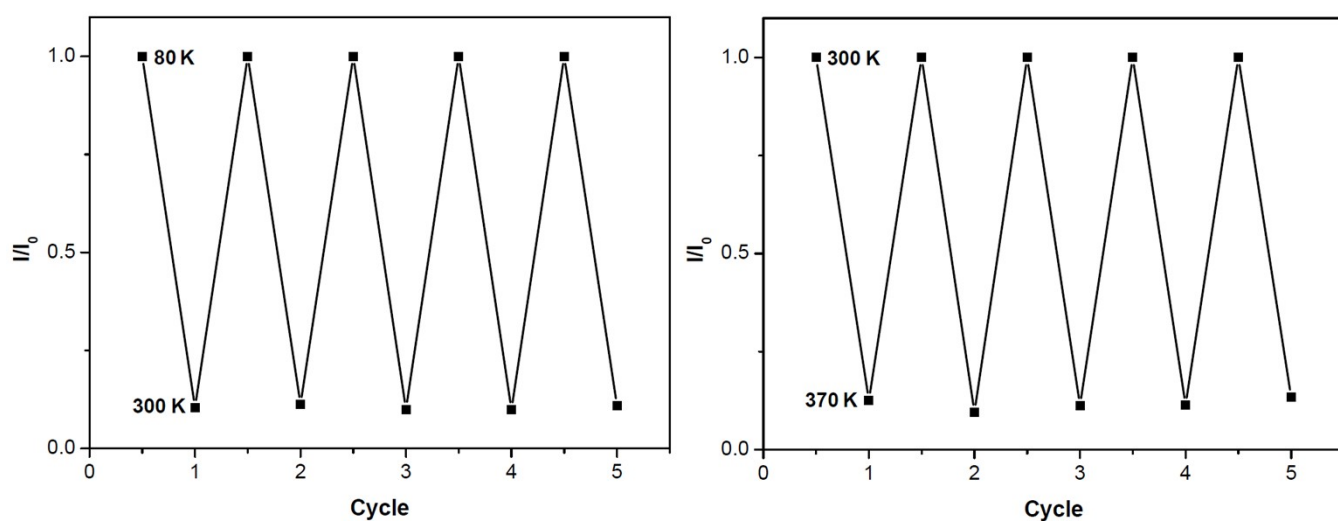

**Fig. s5.** PL intensity of 1 over five cycles between 80 and 300 K (left) and between 300 and 370 K (right). The excitation wavelength was 370 nm.

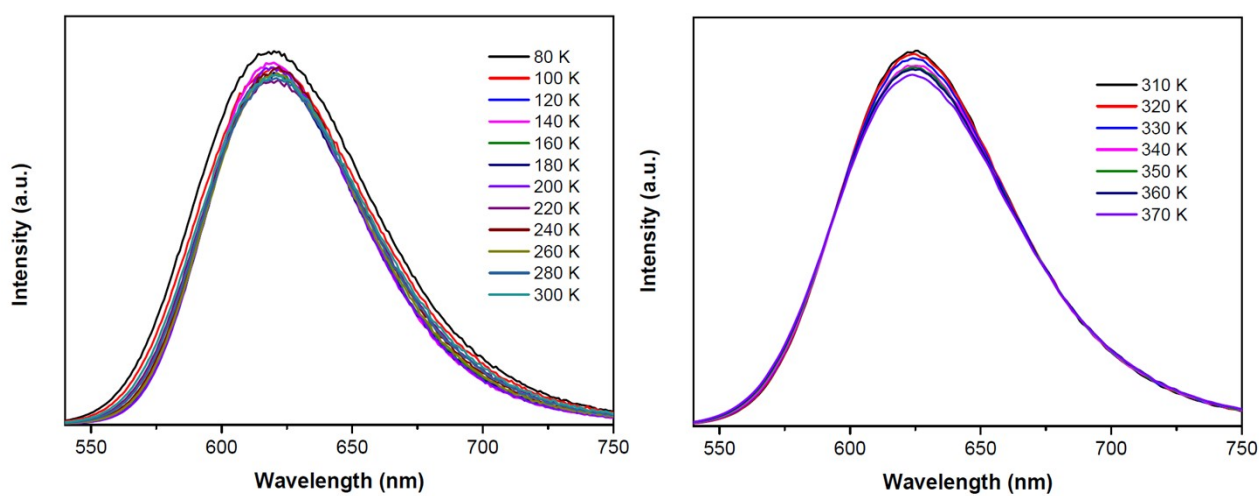

**Fig. s6.** Emission spectra of N630 at 80-300 K (left) and at 300-370 K (right) at an excitation wavelength of 370 nm.

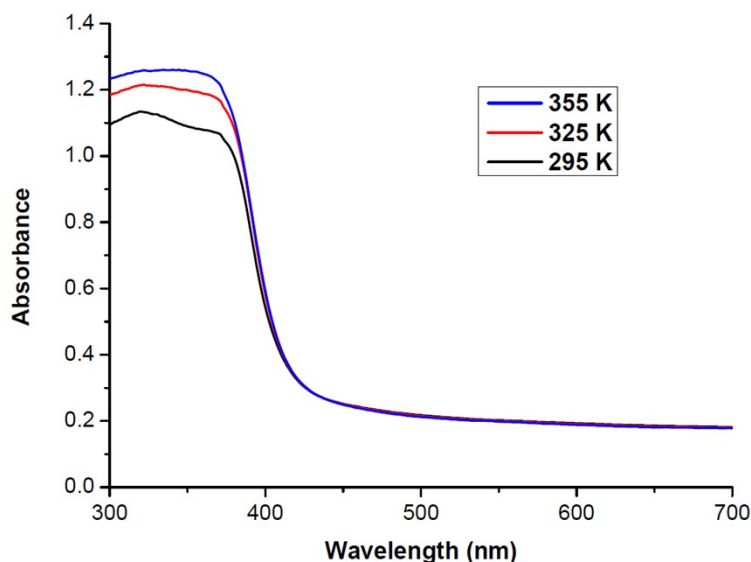

Fig. S7. Solid-state UV-Vis spectra of compound **1** at 295, 325 and 355 K

Table S1. Selected crystallographic data and refinement parameters for **1**·EtOH at different temperatures.

| Temperature                             | 110 K                                                                                                        | 140 K       | 180 K       | 220 K       | 260 K       | 300 K       |
|-----------------------------------------|--------------------------------------------------------------------------------------------------------------|-------------|-------------|-------------|-------------|-------------|
| Empirical formula                       | C <sub>8</sub> H <sub>77</sub> Au <sub>4</sub> CIN <sub>4</sub> O <sub>7</sub> P <sub>4</sub> S <sub>3</sub> |             |             |             |             |             |
| Formula weight                          | 2309.88                                                                                                      |             |             |             |             |             |
| Crystal system                          | triclinic                                                                                                    |             |             |             |             |             |
| Space group                             | <i>P</i> $\bar{1}$                                                                                           |             |             |             |             |             |
| <i>a</i> /Å                             | 11.2814(9)                                                                                                   | 11.2999(9)  | 11.3296(10) | 11.3392(6)  | 11.3501(6)  | 11.3650(7)  |
| <i>b</i> /Å                             | 16.5641(14)                                                                                                  | 16.5823(13) | 16.6117(14) | 16.6308(9)  | 16.6508(9)  | 16.6659(9)  |
| <i>c</i> /Å                             | 23.6076(19)                                                                                                  | 23.6305(19) | 23.632(2)   | 23.7027(13) | 23.7568(13) | 23.8298(13) |
| $\alpha$ /°                             | 81.379(3)                                                                                                    | 81.265(3)   | 81.126(4)   | 80.931(2)   | 80.641(2)   | 80.294(2)   |
| $\beta$ /°                              | 89.680(4)                                                                                                    | 89.613(4)   | 89.448(4)   | 89.323(2)   | 89.174(3)   | 89.011(2)   |
| $\gamma$ /°                             | 73.274(3)                                                                                                    | 73.337(3)   | 73.432(4)   | 73.566(2)   | 73.746(2)   | 73.898(2)   |
| <i>V</i> /Å <sup>3</sup>                | 4173.8(6)                                                                                                    | 4189.5(6)   | 4209.3(6)   | 4231.1(4)   | 4250.6(4)   | 4272.3(4)   |
| <i>Z</i>                                | 2                                                                                                            | 2           | 2           | 2           | 2           | 2           |
| $\rho_{\text{calc}}$ /g·cm <sup>3</sup> | 1.838                                                                                                        | 1.831       | 1.822       | 1.813       | 1.805       | 1.796       |
| $\mu$ /mm <sup>-1</sup>                 | 10.307                                                                                                       | 10.269      | 10.221      | 10.168      | 10.121      | 10.070      |
| <i>F</i> (000)                          | 2224                                                                                                         | 2224        | 2224        | 2224        | 2224        | 2224        |
| <i>R</i> <sub>1</sub> <sup>a</sup>      | 0.0324                                                                                                       | 0.0324      | 0.0367      | 0.0383      | 0.0442      | 0.0594      |
| <i>wR</i> <sub>2</sub> <sup>b</sup>     | 0.0825                                                                                                       | 0.0818      | 0.0926      | 0.1027      | 0.1273      | 0.1932      |
| <i>GOF</i> <sup>c</sup>                 | 1.057                                                                                                        | 1.040       | 1.046       | 1.057       | 1.065       | 1.085       |

<sup>a</sup> $R_1 = \sum ||F_o| - |F_c|| / \sum |F_o|$ , <sup>b</sup> $wR_2 = \{\sum w(F_o^2 - F_c^2)^2 / \sum w(F_o^2)^2\}^{1/2}$ . <sup>c</sup> $GOF = \{\sum w((F_o^2 - F_c^2)^2) / (n-p)\}^{1/2}$ , where *n* = number of reflection and *p* = total number of parameters refined.

**Table S2.** Selected Bond Lengths (Å) and Angles (°) of 1·EtOH at different temperatures.

| Temperature | 110 K      | 140 K      | 180 K      | 220 K      | 260 K      | 300 K      |
|-------------|------------|------------|------------|------------|------------|------------|
| Au2–Au3     | 3.0710(4)  | 3.0788(3)  | 3.0862(4)  | 3.0987(4)  | 3.1106(5)  | 3.1287(7)  |
| Au2–Cl1     | 2.2994(11) | 2.2982(12) | 2.2965(13) | 2.2974(14) | 2.2943(17) | 2.292(2)   |
| Au1–P1      | 2.2602(11) | 2.2589(12) | 2.2567(14) | 2.2581(14) | 2.2580(17) | 2.261(3)   |
| Au2–P2      | 2.2320(11) | 2.2313(11) | 2.2329(13) | 2.2335(13) | 2.2324(16) | 2.235(2)   |
| Au3–P3      | 2.2607(12) | 2.2592(13) | 2.2587(15) | 2.2573(16) | 2.255(2)   | 2.252(3)   |
| Au4–P4      | 2.2547(13) | 2.2553(13) | 2.2513(15) | 2.2519(16) | 2.251(2)   | 2.251(3)   |
| Au1–S1      | 2.3102(11) | 2.3097(12) | 2.3092(13) | 2.3092(14) | 2.3089(17) | 2.304(3)   |
| Au3–S2      | 2.3119(13) | 2.3109(14) | 2.3091(17) | 2.3061(19) | 2.308(2)   | 2.309(4)   |
| Au4–S3      | 2.2952(12) | 2.2953(13) | 2.2933(15) | 2.2893(17) | 2.290(2)   | 2.290(3)   |
| P1–Au1–S1   | 174.35(4)  | 174.43(4)  | 174.49(5)  | 174.53(5)  | 174.64(6)  | 174.77(9)  |
| P2–Au2–Cl1  | 177.44(4)  | 177.35(4)  | 177.19(5)  | 177.05(5)  | 177.01(6)  | 176.82(9)  |
| P2–Au2–Au3  | 98.12(3)   | 98.27(3)   | 98.42(3)   | 98.85(4)   | 99.22(4)   | 99.70(6)   |
| Cl1–Au2–Au3 | 84.37(3)   | 84.33(3)   | 84.35(4)   | 84.08(4)   | 83.76(5)   | 83.48(7)   |
| P3–Au3–S2   | 174.68(5)  | 174.73(5)  | 174.81(6)  | 174.98(7)  | 175.03(8)  | 174.90(13) |
| P3–Au3–Au2  | 102.28(3)  | 102.40(3)  | 102.30(4)  | 102.45(4)  | 102.63(5)  | 102.80(7)  |
| S2–Au3–Au2  | 82.92(4)   | 82.77(4)   | 82.77(5)   | 82.50(5)   | 82.28(7)   | 82.22(10)  |
| P4–Au4–S3   | 174.25(4)  | 174.40(5)  | 174.56(6)  | 174.72(6)  | 174.99(8)  | 175.34(11) |
